# Supplementary material
Source: MDPI journal article supplement (https://www.mdpi.com/1999-4907/14/8/1523)
Supplement: s1 [file s1 › Supplemental Figures.pdf]

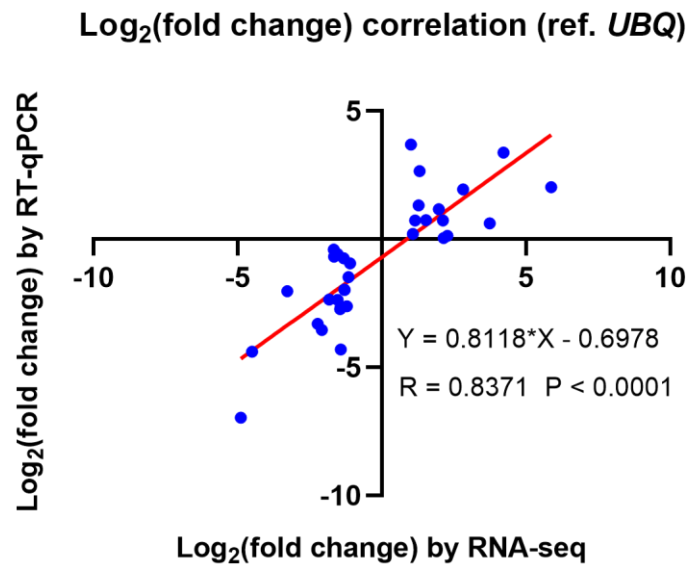

**Figure. S2** RT-qPCR validation of the expression levels of B3 genes. The correlation between log<sub>2</sub>(fold changes) of B3 genes were analyzed by RNA-seq and by RT-qPCR. RT-qPCR results were expressed on the basis of *UBQ*.
