# Supplementary material
Source: MDPI journal article supplement (https://www.mdpi.com/1999-4907/14/8/1523)
Supplement: s1 [file s1 › Supplemental Tables.xlsx]

## Sheet: Table S1
Table S1 Primers used in this study.
Gene name	Gene ID	Forward (5'-3')	Reverse (5'-3')	Product length (bp)
PaABI3-2	PaJTYG0400018257.01	AGCAATGACGAGGATGGCAA	CGTACGTTGTTATGCTGCCG	143
PaHSI3	PaJTYG0600025210.01	GAGGCTCAGGATTTGCTTCG	ATGAACGCCTGCTTTGATCC	256
PaRAV3	PaJTYG0700028111.01	GACCCCATTTCCTCCCTCAA	TGGTGCTGTAAATGGTTGGC	178
PaRAV4	PaJTYG0200009682.01	TCTACCGGTAAGCGGCTTAG	GCAGTGGTATTTGGTTGGCA	199
PaARF5	PaJTYG0100004427.01	GCCAACCAAAACCAAAGTGC	GGCCCCTGTGATCTAAGTGT	212
PaARF15	PaJTYG0500020522.01	TCGCCATATCTTCCGAGGTC	ACAGTGAACATCGTCCCTGT	258
PaREM27	PaJTYG0100005185.01	GGCCGCCAAGTTATCATACG	CCTCCTCACCACAACCATCT	184
PaREM28	PaJTYG0800031227.01	CCGGTTCGATGCCTTTACAG	TGGTTCACAAATCCTGCAGC	179
UBQ	PaJTYG0400016266.01	AAGGCTAAGATCCAAGACAAAGAG	CCACGAAGACGAAGCACTAAG	146

## Sheet: Table S2
Table S2 Characteristics of apricot B3 transcription factor superfamily.
Gene name	Subfamily	Gene ID	Length (aa)	Molecular weight (kDa)	PIs	Instability index	Aliphatic index	GRAVY
PaABI3-1	ABI3	PaJTYG0800030128.01	802	89.3	5.97	61.71	56.73	-0.864
PaABI3-2	ABI3	PaJTYG0400018257.01	497	55.1	5.61	53.72	58.19	-0.781
PaABI3-3	ABI3	PaJTYG0100002745.01	273	31.5	4.54	52.01	74.95	-0.357
PaABI3-4	ABI3	PaJTYG0300011223.01	322	35.9	5.71	41.79	70.28	-0.443
PaARF1	ARF	PaJTYG0100005934.01	600	66.2	6.52	51.46	71.62	-0.365
PaARF2	ARF	PaJTYG0200009832.01	674	74.7	6.46	47.25	67.85	-0.437
PaARF3	ARF	PaJTYG0600022887.01	719	79.2	7.59	43.34	70.4	-0.421
PaARF4	ARF	PaJTYG0600024548.01	729	80.5	6.17	51.07	66.23	-0.406
PaARF5	ARF	PaJTYG0100004427.01	954	104.3	5.27	55.14	78.19	-0.366
PaARF6	ARF	PaJTYG0700027004.01	1166	130.5	6.25	73.35	68.01	-0.72
PaARF7	ARF	PaJTYG0100000793.01	1147	127.1	6.22	66.21	70.85	-0.641
PaARF8	ARF	PaJTYG0300014901.01	844	94.2	5.77	64.36	69.77	-0.5
PaARF9	ARF	PaJTYG0300014876.01	844	94.2	5.77	64.36	69.77	-0.5
PaARF10	ARF	PaJTYG0400017835.01	889	98.5	6.11	65.53	74.57	-0.438
PaARF11	ARF	PaJTYG0300012783.01	912	100.5	6.03	65.18	76.13	-0.453
PaARF12	ARF	PaJTYG0400018206.01	716	78.3	6.19	52.01	62.26	-0.516
PaARF13	ARF	PaJTYG0100006896.01	678	75.5	6	60.23	69.99	-0.519
PaARF14	ARF	PaJTYG0800029604.01	251	28.7	9.28	52.23	71.99	-0.388
PaARF15	ARF	PaJTYG0500020522.01	846	94.3	6.55	52.36	66.49	-0.629
PaARF16	ARF	PaJTYG0500020287.01	681	75.3	6.2	57.01	68.3	-0.515
PaARF17	ARF	PaJTYG0200009536.01	698	77.4	6.37	51.98	74.67	-0.441
PaHSI1	HSI	PaJTYG0400016430.01	323	35.9	7.13	36.19	66.19	-0.437
PaHSI2	HSI	PaJTYG0400018438.01	884	97.3	7.4	49.12	66.56	-0.642
PaHSI3	HSI	PaJTYG0600025210.01	906	99.7	6.51	54.72	71.32	-0.601
PaHSI4	HSI	PaJTYG0600022159.01	987	108.5	6.92	52.88	65.19	-0.656
PaRAV1	RAV	PaJTYG0600021806.01	369	42.8	6.24	52.17	70.03	-0.653
PaRAV2	RAV	PaJTYG0300012112.01	314	36.2	8.08	37.97	74.14	-0.607
PaRAV3	RAV	PaJTYG0700028111.01	375	41.9	6.25	63.24	49.2	-0.937
PaRAV4	RAV	PaJTYG0200009682.01	350	39.9	8.28	44.53	62.37	-0.875
PaRAV5	RAV	PaJTYG0500020442.01	484	54.2	6.91	59.58	57.64	-0.861
PaRAV6	RAV	PaJTYG0100003751.01	259	28.3	7.17	50.83	65.56	-0.766
PaRAV7	RAV	PaJTYG0500019543.01	254	29.5	6.34	34.38	66.02	-0.584
PaRAV8	RAV	PaJTYG0700026212.01	463	52.7	8.84	49.08	70.48	-0.364
PaREM1	REM	PaJTYG0500020030.01	226	25.8	8.95	60.92	71.59	-0.715
PaREM2	REM	PaJTYG0700026642.01	327	36.8	5.06	55.79	69.57	-0.725
PaREM3	REM	PaJTYG0700026643.01	258	29.4	8.87	51.14	73.72	-0.688
PaREM4	REM	PaJTYG0700026644.01	270	30.8	7.02	52.01	71.15	-0.731
PaREM5	REM	PaJTYG0100006055.01	290	32.7	10.02	53.04	75.28	-0.188
PaREM6	REM	PaJTYG0100004661.01	233	25.8	9.99	42.97	75.75	-0.296
PaREM7	REM	PaJTYG0700027605.01	334	38.2	7.58	53.13	78.23	-0.46
PaREM8	REM	PaJTYG0700028734.01	450	51.7	8.89	45.94	77.96	-0.466
PaREM9	REM	PaJTYG0700027606.01	709	79.4	9.14	47.55	72.36	-0.431
PaREM10	REM	PaJTYG0800031226.01	316	36.2	6	54.91	62.34	-0.797
PaREM11	REM	PaJTYG0700027601.01	150	17.4	9.48	50.72	72.13	-0.649
PaREM12	REM	PaJTYG0100004660.01	567	63.4	8.85	40.73	69.96	-0.378
PaREM13	REM	PaJTYG0500020670.01	611	67.5	6.08	40.85	80.25	-0.434
PaREM14	REM	PaJTYG0400016557.01	182	20.5	9.61	44.45	64.89	-0.496
PaREM15	REM	PaJTYG0700028505.01	292	33.4	9.42	45.66	74.73	-0.599
PaREM16	REM	PaJTYG0100004659.01	261	29.6	8.87	40.66	78.39	-0.328
PaREM17	REM	PaJTYG0400016560.01	296	34	9.69	52.62	81.28	-0.48
PaREM18	REM	PaJTYG0400016559.01	330	37.5	9.36	44.58	83.21	-0.235
PaREM19	REM	PaJTYG0400016245.01	297	33.4	9.74	39.09	81.95	-0.35
PaREM20	REM	PaJTYG0400016558.01	301	34.3	9.27	41.04	70.56	-0.542
PaREM21	REM	PaJTYG0800031105.01	449	51.5	8.43	52.86	82.94	-0.532
PaREM22	REM	PaJTYG0600022134.01	640	72.5	9.52	82.2	52.81	-1.155
PaREM23	REM	PaJTYG0700027704.01	497	55.5	6.2	49.45	74.75	-0.652
PaREM24	REM	PaJTYG0800031104.01	418	47	5.47	45.94	87.44	-0.233
PaREM25	REM	PaJTYG0800031103.01	450	50.3	5.21	51.12	87.51	-0.336
PaREM26	REM	PaJTYG0100005184.01	233	26.5	9.77	48.36	79.44	-0.57
PaREM27	REM	PaJTYG0100005185.01	222	25.3	9.76	56.84	77.75	-0.588
PaREM28	REM	PaJTYG0800031227.01	420	47.8	9.17	43.11	72.6	-0.514
PaREM29	REM	PaJTYG0600024478.01	283	31.9	6.01	39.13	78.83	-0.378
PaREM30	REM	PaJTYG0700028816.01	282	32.2	5.01	66.93	66.35	-0.604
PaREM31	REM	PaJTYG0100006828.01	308	35.3	5.21	60.38	69.64	-0.615
PaREM32	REM	PaJTYG0800031641.01	290	33.2	8.7	34.74	72.24	-0.464
PaREM33	REM	PaJTYG0700027607.01	220	25	8.93	43.49	70.09	-0.463
PaREM34	REM	PaJTYG0700027608.01	418	47.5	7.69	41.13	74.38	-0.426
PaREM35	REM	PaJTYG0700027604.01	623	71.1	9.31	48.83	70.26	-0.511
PaREM36	REM	PaJTYG0700027603.01	532	61.2	8.47	41.9	68.31	-0.643
PaREM37	REM	PaJTYG0300014046.01	545	62.6	9.8	50.91	67.6	-0.586
PaREM38	REM	PaJTYG0700026640.01	374	42.1	4.66	73.75	74.33	-0.542
PaREM39	REM	PaJTYG0500020049.01	209	23.8	6.02	55.25	71.29	-0.688
PaREM40	REM	PaJTYG0500019945.01	225	25.7	8.6	46	73.24	-0.673
PaREM41	REM	PaJTYG0500020047.01	245	28.2	8.69	53.84	83.14	-0.404
PaREM42	REM	PaJTYG0500020050.01	214	24.5	9.47	33.1	73.83	-0.694

## Sheet: Table S3
Table S3 Duplication events of apricot B3 genes.
Gene 1	Gene 2	Duplicated model
PaREM16	PaREM12	tandem
PaREM26	PaREM27	tandem
PaREM18	PaREM20	tandem
PaREM17	PaREM18	tandem
PaREM39	PaREM42	tandem
PaREM2	PaREM38	tandem
PaREM3	PaREM2	tandem
PaREM4	PaREM3	tandem
PaREM35	PaREM36	tandem
PaREM7	PaREM35	tandem
PaREM9	PaREM7	tandem
PaREM33	PaREM9	tandem
PaREM34	PaREM33	tandem
PaREM24	PaREM25	tandem
PaREM21	PaREM24	tandem
PaABI3-3	PaABI3-4	segmental
PaRAV6	PaRAV2	segmental
PaREM12	PaREM9	segmental
PaREM27	PaREM24	segmental
PaARF17	PaARF16	segmental
PaRAV4	PaRAV5	segmental
PaARF2	PaARF4	segmental
PaARF2	PaARF3	segmental
PaARF3	PaARF4	segmental
PaHSI4	PaHSI3	segmental
PaREM34	PaREM28	segmental
PaREM23	PaREM21	segmental

## Sheet: Table S4
Table S4 Synteny gene pairs of apricot\Arabidopsis.
apricot gene	Arabidopsis gene
PaABI3-1	AT3G24650
PaRAV6	AT1G68840
PaRAV6	AT1G13260
PaRAV6	AT1G25560
PaRAV6	AT3G25730
PaABI3-2	AT1G28300
PaABI3-3	AT3G26790
PaABI3-4	AT3G26790
PaARF1	AT1G77850
PaARF3	AT2G28350
PaARF5	AT1G19850
PaARF6	AT1G19220
PaARF6	AT5G20730
PaARF10	AT1G30330
PaARF12	AT2G33860
PaARF16	AT4G23980
PaARF17	AT2G46530
PaARF17	AT3G61830
PaHSI4	AT2G30470
PaRAV3	AT2G36080
PaRAV3	AT3G11580
PaRAV3	AT5G06250
PaRAV4	AT2G46870
PaRAV4	AT3G61970
PaRAV4	AT4G01500
PaREM10	AT3G18990
PaREM21	AT3G19184
PaREM22	AT5G58280
PaREM23	AT3G19184
PaREM28	AT1G49475
PaREM28	AT3G18960

## Sheet: Table S5
Table S5 Correlation between the expression level of ABI3 and oil content, as well as ABI3 and Oleosin based on FPKM values
Gene ID 1	Gene name 1	Pearson correlation coefficient 1 (ABI3 vs Oli content)	Pearson correlation coefficient 1 (ABI3 vs Oleosin)	Oleosins (Gene ID)	Binding Motif (CATGCA)
PaJTYG0800030128.01	ABI3-1	0.9378	0.910115	PaJTYG0200010520.01	Yes
PaJTYG0800030128.01	ABI3-1	0.9378	0.39562	PaJTYG0100005248.01	Yes
PaJTYG0800030128.01	ABI3-1	0.9378	0.190363	PaJTYG0300011476.01	Yes
PaJTYG0800030128.01	ABI3-1	0.9378	0.509289	PaJTYG0500020823.01	Yes
PaJTYG0800030128.01	ABI3-1	0.9378	0.28852	PaJTYG0600022030.01	Yes
PaJTYG0800030128.01	ABI3-1	0.9378	0.884313	PaJTYG0500021373.01	No
PaJTYG0800030128.01	ABI3-1	0.9378	-0.591864	PaJTYG0500020851.01	No
PaJTYG0800030128.01	ABI3-1	0.9378	-0.441187	PaJTYG0500020345.01	No
PaJTYG0800030128.01	ABI3-1	0.9378	0.306558	PaJTYG0200008597.01	No
PaJTYG0800030128.01	ABI3-1	0.9378	0.190363	PaJTYG0300011476.01	Yes
PaJTYG0400018257.01	ABI3-2	0.5924	0.914177	PaJTYG0200010520.01	Yes
PaJTYG0400018257.01	ABI3-2	0.5924	0.0642673	PaJTYG0100005248.01	Yes
PaJTYG0400018257.01	ABI3-2	0.5924	0.0664924	PaJTYG0300011476.01	Yes
PaJTYG0400018257.01	ABI3-2	0.5924	0.130012	PaJTYG0500020823.01	Yes
PaJTYG0400018257.01	ABI3-2	0.5924	0.28852	PaJTYG0600022030.01	Yes
PaJTYG0400018257.01	ABI3-2	0.5924	0.572695	PaJTYG0500021373.01	No
PaJTYG0400018257.01	ABI3-2	0.5924	-0.102519	PaJTYG0500020851.01	No
PaJTYG0400018257.01	ABI3-2	0.5924	-0.801396	PaJTYG0500020345.01	No
PaJTYG0400018257.01	ABI3-2	0.5924	0.615503	PaJTYG0200008597.01	No
PaJTYG0400018257.01	ABI3-2	0.5924	0.0664924	PaJTYG0300011476.01	Yes
PaJTYG0100002745.01	ABI3-3	-0.8167	0.770658	PaJTYG0200010520.01	Yes
PaJTYG0100002745.01	ABI3-3	-0.8167	0.101635	PaJTYG0100005248.01	Yes
PaJTYG0100002745.01	ABI3-3	-0.8167	0.0327776	PaJTYG0300011476.01	Yes
PaJTYG0100002745.01	ABI3-3	-0.8167	0.279753	PaJTYG0500020823.01	Yes
PaJTYG0100002745.01	ABI3-3	-0.8167	-0.0392775	PaJTYG0600022030.01	Yes
PaJTYG0100002745.01	ABI3-3	-0.8167	0.541494	PaJTYG0500021373.01	No
PaJTYG0100002745.01	ABI3-3	-0.8167	-0.365272	PaJTYG0500020851.01	No
PaJTYG0100002745.01	ABI3-3	-0.8167	-0.62165	PaJTYG0500020345.01	No
PaJTYG0100002745.01	ABI3-3	-0.8167	0.146856	PaJTYG0200008597.01	No
PaJTYG0100002745.01	ABI3-3	-0.8167	0.0327776	PaJTYG0300011476.01	Yes
PaJTYG0300011223.01	ABI3-4	0.8919	0.461948	PaJTYG0200010520.01	Yes
PaJTYG0300011223.01	ABI3-4	0.8919	-0.308809	PaJTYG0100005248.01	Yes
PaJTYG0300011223.01	ABI3-4	0.8919	-0.23974	PaJTYG0300011476.01	Yes
PaJTYG0300011223.01	ABI3-4	0.8919	-0.348914	PaJTYG0500020823.01	Yes
PaJTYG0300011223.01	ABI3-4	0.8919	-0.373148	PaJTYG0600022030.01	Yes
PaJTYG0300011223.01	ABI3-4	0.8919	0.0994066	PaJTYG0500021373.01	No
PaJTYG0300011223.01	ABI3-4	0.8919	0.301402	PaJTYG0500020851.01	No
PaJTYG0300011223.01	ABI3-4	0.8919	-0.496245	PaJTYG0500020345.01	No
PaJTYG0300011223.01	ABI3-4	0.8919	0.377204	PaJTYG0200008597.01	No
PaJTYG0300011223.01	ABI3-4	0.8919	-0.23974	PaJTYG0300011476.01	Yes
